# Supplementary material for: The integrated stress response regulates BMP signalling through effects on translation
Source: PubMed Central journal article supplement (PMC5881181; doi:10.1186/s12915-018-0503-x), 2018-04-03

a

| Driver              | Tissue                                          | <i>dPPP1R15</i> RNAi |
|---------------------|-------------------------------------------------|----------------------|
| <i>tub-Gal4</i>     | Ubiquitous                                      | embryonic lethal     |
| <i>Da-Gal4</i>      | Ubiquitous                                      | small delayed larvae |
| <i>actin-Gal4</i>   | Ubiquitous                                      | small delayed larvae |
| <i>e22c-Gal4</i>    | Ectoderm                                        | embryonic lethal     |
| <i>CG-Gal4</i>      | Fat body                                        | no phenotype         |
| <i>MHC-Gal4</i>     | Somatic muscle                                  | no phenotype         |
| <i>Mef2-Gal4</i>    | Somatic muscle                                  | no phenotype         |
| <i>fkf-Gal4</i>     | Salivary gland                                  | no phenotype         |
| <i>twist-Gal4</i>   | Midgut visceral mesoderm, muscle                | no phenotype         |
| <i>APPL-Gal4</i>    | CNS                                             | no phenotype         |
| <i>179Y-Gal4</i>    | CNS                                             | no phenotype         |
| <i>elav-Gal4</i>    | CNS                                             | no phenotype         |
| <i>dILP2-3-Gal4</i> | CNS, ring gland, heart                          | no phenotype         |
| <i>dILP2-Gal4</i>   | CNS, ring gland, heart                          | no phenotype         |
| <i>GMR-Gal4</i>     | Eye imaginal disc                               | no phenotype         |
| <i>esg-Gal4</i>     | Gut, larval histoblasts, CNS and imaginal discs | large delayed larvae |
| <i>en-Gal4</i>      | Wing imaginal disc (posterior compartment)      | delayed pupation     |

b

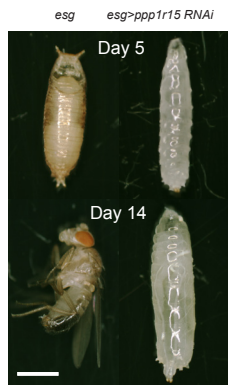

c

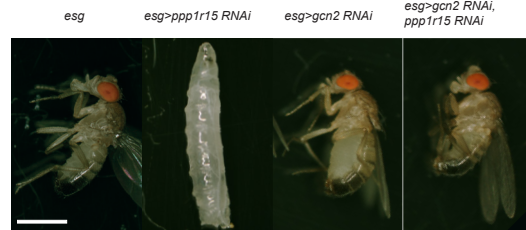

d

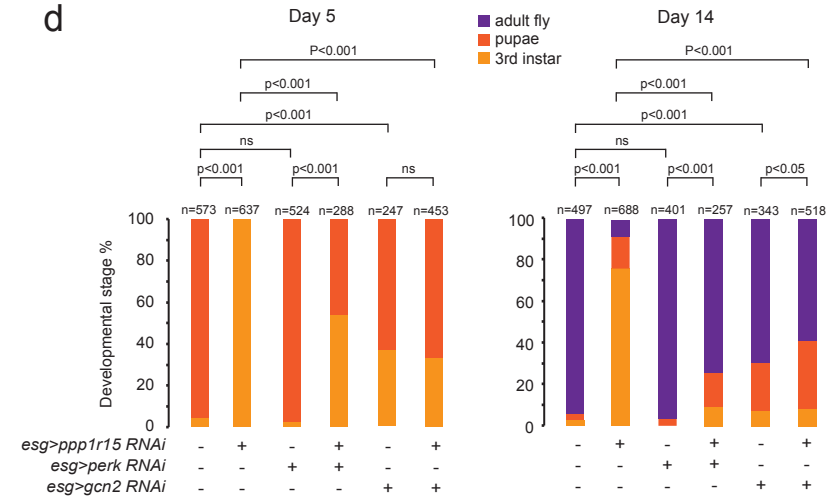

e

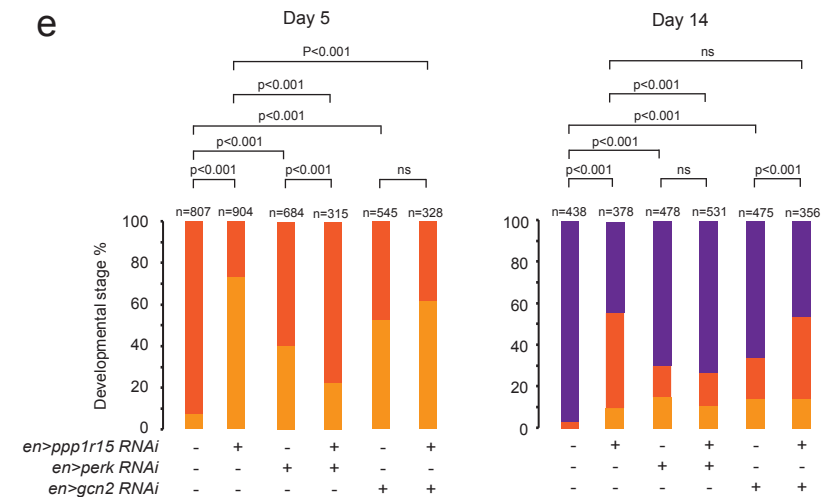

f

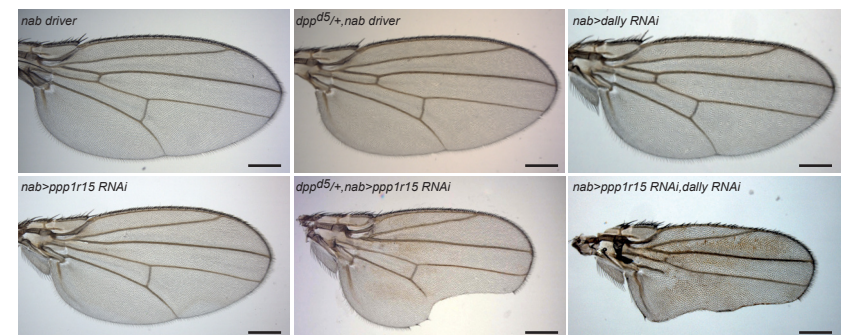

Supplement: 12915_2018_503_MOESM1_ESM.pdf [file 12915_2018_503_MOESM1_ESM.pdf]
