# Supplementary material for: The integrated stress response regulates BMP signalling through effects on translation
Source: PubMed Central journal article supplement (PMC5881181; doi:10.1186/s12915-018-0503-x), 2018-04-03

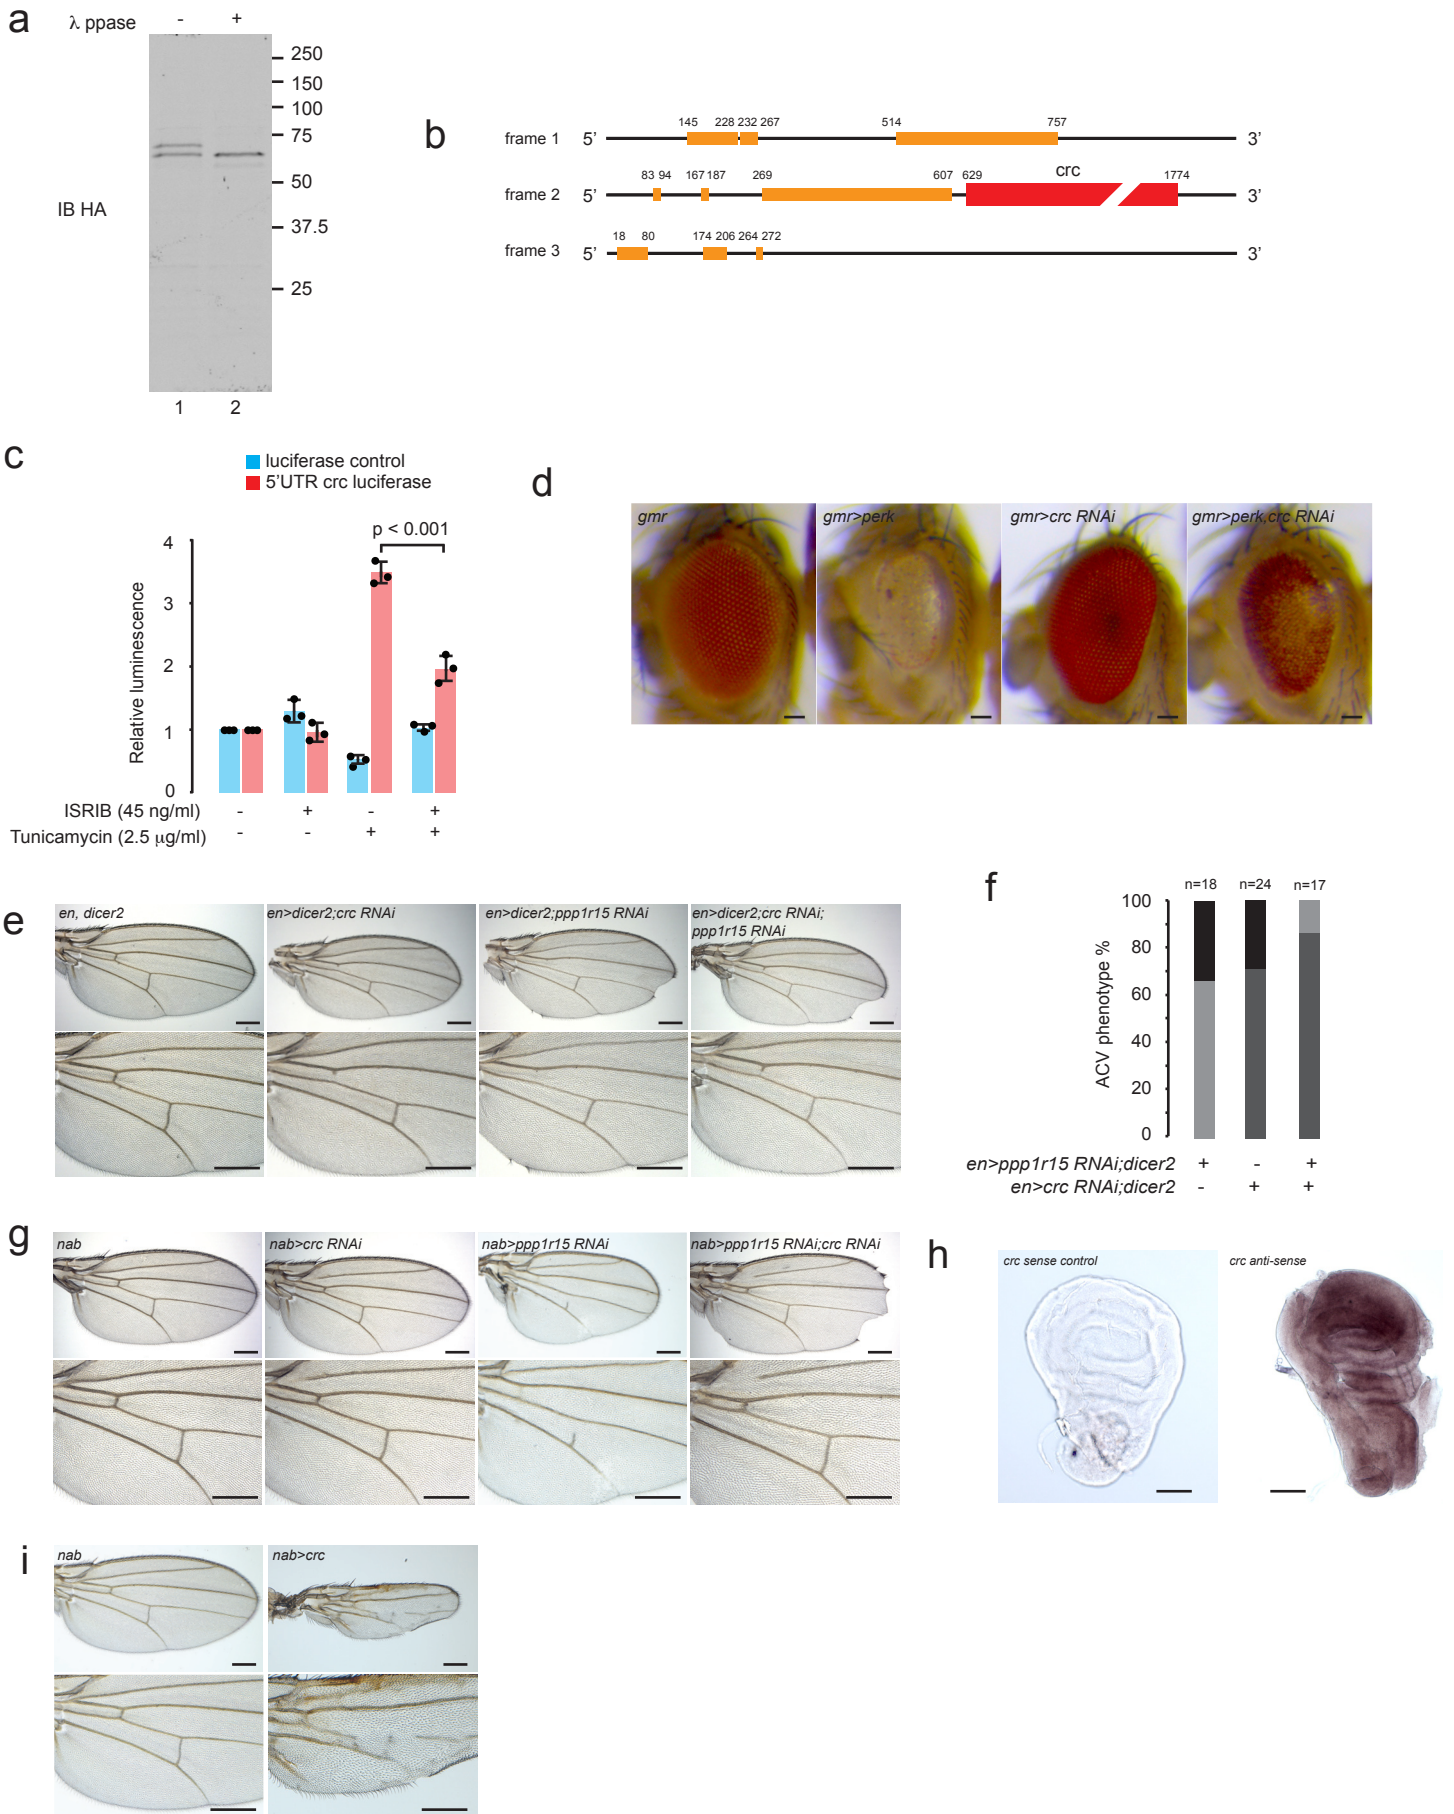

Supplement: 12915_2018_503_MOESM2_ESM.pdf [file 12915_2018_503_MOESM2_ESM.pdf]
